# Supplementary material for: Antidepressant Outcomes Predicted by Genetic Variation in Corticotropin-Releasing Hormone Binding Protein
Source: Atypon-hosted journal article supplement (doi:10.1176/appi.ajp.2017.17020172), 2017-12-15
Supplement: appi.ajp.2017.17020172.ds001.pdf [file appi.ajp.2017.17020172.ds001.pdf]

 


Psychiatry Online
