# Supplementary material for: Antidepressant Outcomes Predicted by Genetic Variation in Corticotropin-Releasing Hormone Binding Protein
Source: Atypon-hosted journal article supplement (doi:10.1176/appi.ajp.2017.17020172), 2017-12-15
Supplement: appi.ajp.2017.17020172.ds001.pdf [file appi.ajp.2017.17020172.ds001.pdf]

## Supplementary Methods

### Trial

The PReDICT study recruited 344 subjects through the Mood and Anxiety Disorders Program at Emory University. The study design has been published previously (Dunlop et al., 2012). Ethical approval was given by The Emory Institutional Review Board and the Grady Hospital Research Oversight Committee and the study was registered at [ClinicalTrials.gov](https://clinicaltrials.gov) (NCT00360399).

### Participants

PReDICT enrolled treatment-naïve participants ages 18-65 years with primary diagnosis of non-psychotic depression, meeting DSM-IV criteria for current major depressive disorder (HDRS score  $\geq 18$  at screening and  $\geq 15$  at baseline). The current study included subjects from the per-protocol completer dataset (N = 234) (Dunlop et al., 2017); patients who completed 12 weeks of treatment, met all inclusion/exclusion criteria, had no major protocol violations, and whose end-of-treatment antidepressant medication (ADM) corresponded with the baseline assigned treatment.

### Treatment

Participants were randomly assigned to one of three possible treatments: CBT delivered as 16 one-hour individual sessions; duloxetine 30-60 mg/day or escitalopram 10-20 mg/day. Only individuals randomized to either duloxetine or escitalopram were considered in further analyses (N=151).

### Genotyping, quality control and imputation

Genome-wide genotypes (Illumina OmniExpress array) were measured in peripheral blood DNA drawn at baseline randomization. All relatives of individual subjects (N = 3,  $\text{Pihat} \geq 0.125$ ) were excluded, as well as those with low genotyping (N = 5). From the per-protocol completer participants who agreed to provide DNA; five did not pass genotyping-QC and three were removed for relatedness based on identity by descent (IBD). A total of 215 genotyped individuals remained after initial quality control (QC).

Participant genotype data were imputed against the 1000 Genomes Project Phase 3 reference haplotypes with IMPUTE2 (Howie et al., 2009) and pre-phased with SHAPEIT2 (Delaneau et al., 2012). We retained only SNPs with Hardy-Weinberg equilibrium P value  $\geq 1 \times 10^{-6}$ , and imputation info scores of  $\geq 0.8$ . After QC 8,621,204 SNPs remained. The SNP of interest (rs2865143) was extracted from the imputed data and only individuals with complete imputed genotypes for rs2865143 (N = 141) were included in the replication analyses. The best-guess genotype call rate in full sample was 0.933775.

## Treatment Outcome Measures

Symptoms severity was assessed weekly by blinded raters for the first 6 weeks, then every two weeks for the second 6 weeks. Identically to the discovery sample, remission was defined as an HDRS score  $\leq 7$  at week eight and response as an HDRS score improvement of  $\geq 50\%$  from baseline to week eight.

## References

- Dunlop BW, Binder EB, Cubells JF, Goodman MM, Kelley ME, Kinkead B, Kutner M, Nemeroff CB, Newport DJ, Owens MJ, Pace TWW, Ritchie JC, Rivera VA, Westen D, Craighead WE, Mayberg HS. Predictors of remission in depression to individual and combined treatments (PREdict): study protocol for a randomized controlled trial. *Trials* 2012; 13:106
- Delaneau, O., Marchini, J., Zagury, J.-F., 2012. A linear complexity phasing method for thousands of genomes. *Nat. Methods* 9, 179–81. doi:10.1038/nmeth.1785
- Dunlop, B.W., Binder, E.B., Cubells, J.F., Goodman, M.M., Kelley, M.E., Kinkead, B., Kutner, M., Nemeroff, C.B., Newport, D.J., Owens, M.J., Pace, T.W.W., Ritchie, J.C., Rivera, V.A., Westen, D., Craighead, W.E., Mayberg, H.S., 2012. Predictors of remission in depression to individual and combined treatments (PREdict): study protocol for a randomized controlled trial. *Trials* 13, 106. doi:10.1186/1745-6215-13-106
- Dunlop, B.W., Rajendra, J.K., Craighead, W.E., Kelley, M.E., McGrath, C.L., Choi, K.S., Kinkead, B., Nemeroff, C.B., Mayberg, H.S., 2017. Functional Connectivity of the Subcallosal Cingulate Cortex And Differential Outcomes to Treatment With Cognitive-Behavioral Therapy or Antidepressant Medication for Major Depressive Disorder. *Am. J. Psychiatry* appi.ajp.2016.1. doi:10.1176/appi.ajp.2016.16050518
- Howie, B.N., Donnelly, P., Marchini, J., Hardy, J., Abecasis, G., 2009. A Flexible and Accurate Genotype Imputation Method for the Next Generation of Genome-Wide Association Studies. *PLoS Genet.* 5, e1000529. doi:10.1371/journal.pgen.1000529

## Extended Discussion

CRHBP is a 322 amino acid protein that is widely conserved across vertebrates and humans (Westphal & Seasholtz, 2006). In humans, CRHBP is expressed not only in a variety of brain regions (including amygdala, hippocampus, and lateral septal nucleus), and also in the body, particularly the liver and placenta (Chan et al., 2000). Between 65 and 90% of all CRH exists as part of a complex with CRHBP, and formation of this complex is thought to regulate levels of free CRH available for receptor binding and downstream cortisol release (Behan et al., 1997). In mouse models, levels of CRHBP increase in response to stress, which in turn may also directly inhibit cortisol release (Seasholtz et al., 2001; Herringa et al., 2004; Stinnett et al., 2015).

## References

- Behan, D.P., Khongsaly, O., Owens, M.J., Chung, H.D., Nemeroff, C.B., De Souza, E.B., 1997. Corticotropin-releasing factor (CRF), CRF-binding protein (CRF-BP), and CRF/CRF-BP complex in Alzheimer's disease and control postmortem human brain. *J. Neurochem.* 68, 2053–60.
- Chan, R.K., Vale, W.W., Sawchenko, P.E., 2000. Paradoxical activational effects of a corticotropin-releasing factor-binding protein &quot;ligand inhibitor&quot; in rat brain. *Neuroscience* 101, 115–29.
- Herringa, R.J., Nanda, S.A., Hsu, D.T., Roseboom, P.H., Kalin, N.H., 2004. The effects of acute stress on the regulation of central and basolateral amygdala CRF-binding protein gene expression. *Mol. Brain Res.* 131, 17–25. doi:10.1016/j.molbrainres.2004.08.005
- Seasholtz, A.F., Burrows, H.L., Karolyi, I.J., Camper, S.A., 2001. Mouse models of altered CRH-binding protein expression. *Peptides* 22, 743–751. doi:10.1016/S0196-9781(01)00387-4
- Stinnett, G.S., Westphal, N.J., Seasholtz, A.F., 2015. Pituitary CRH-binding protein and stress in female mice. *Physiol. Behav.* 150, 16–23. doi:10.1016/j.physbeh.2015.02.050
- Westphal, N.J., Seasholtz, A.F., 2006. CRH-BP: the regulation and function of a phylogenetically conserved binding protein. *Front. Biosci.* 11, 1878–91.

**FIGURE S1. Consort Diagram for the iSPOT-D Trial**

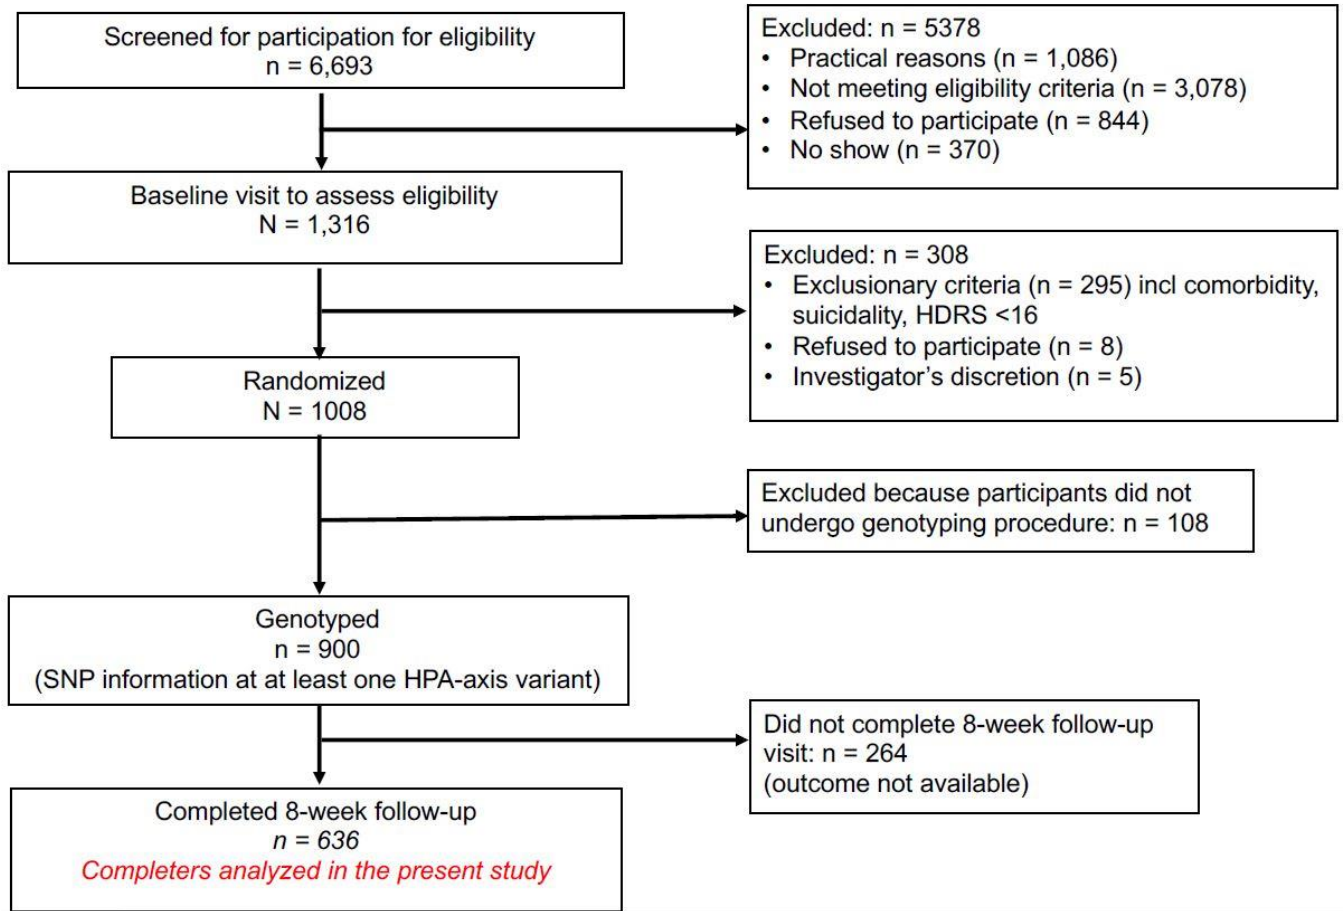

**TABLE S1. Genotypes of completers vs. full genotyped sample at all candidate SNPs (iSPOT-D cohort only)**

| Gene      | SNP        | Completers only (N) |         |         | All genotyped (N) |         |         | Chi-sq or Fisher's exact p-value<br>Completers vs. full genotyped sample |
|-----------|------------|---------------------|---------|---------|-------------------|---------|---------|--------------------------------------------------------------------------|
|           |            | Ref/Ref             | Ref/Alt | Alt/Alt | Ref/Ref           | Ref/Alt | Alt/Alt |                                                                          |
| CRH       | rs3176921  | 455                 | 143     | 38      | 650               | 194     | 56      | 0.88                                                                     |
|           | rs5030875  | 569                 | 64      | 2       | 811               | 84      | 4       | 0.82                                                                     |
| CRHB<br>P | rs10055255 | 201                 | 272     | 159     | 293               | 374     | 26      | 0.90                                                                     |
|           | rs28365143 | 547                 | 84      | 5       | 786               | 108     | 6       | 0.75                                                                     |
| CRHR1     | rs110402   | 191                 | 298     | 144     | 264               | 424     | 209     | 0.94                                                                     |
|           | rs1876828  | 428                 | 174     | 30      | 631               | 228     | 37      | 0.54                                                                     |
|           | rs242924   | 194                 | 289     | 145     | 267               | 414     | 211     | 0.92                                                                     |
|           | rs242939   | 518                 | 107     | 8       | 727               | 159     | 10      | 0.91                                                                     |
|           | rs4076452  | 449                 | 170     | 17      | 639               | 238     | 23      | 0.98                                                                     |
|           | rs6472257  | 495                 | 130     | 11      | 703               | 181     | 16      | 0.98                                                                     |
|           | rs2267712  | 436                 | 176     | 21      | 611               | 263     | 23      | 0.60                                                                     |
| CRHR2     | rs2270007  | 432                 | 175     | 26      | 606               | 257     | 34      | 0.88                                                                     |
|           | rs2284216  | 503                 | 115     | 12      | 705               | 173     | 16      | 0.86                                                                     |
|           | rs4723003  | 511                 | 114     | 11      | 713               | 171     | 16      | 0.86                                                                     |
| NR3C1     | rs6918     | 470                 | 157     | 9       | 660               | 227     | 13      | 0.97                                                                     |
|           | rs2963156  | 418                 | 192     | 26      | 584               | 282     | 34      | 0.87                                                                     |

**TABLE S2. Associations between all candidate SNPs and depression outcome measures in the iSPOT-D sample**

| Gene  | SNP ID     | Response |         | Remission |          | Absolute Reduction |           | % Reduction |          |
|-------|------------|----------|---------|-----------|----------|--------------------|-----------|-------------|----------|
|       |            | $\beta$  | p       | $\beta$   | p        | $\beta$            | p         | $\beta$     | p        |
| CRH   | rs3176921  | -0.18    | 0.21    | -0.14     | 0.33     | -0.66              | 0.11      | 0.0287      | 0.13     |
|       | rs5030875  | 0.25     | 0.38    | 0.0013    | 1.00     | 0.25               | 0.75      | -0.0279     | 0.44     |
| CRHBP | rs10055255 | -0.022   | 0.85    | 0.0083    | 0.94     | -0.03              | 0.93      | 0.0002      | 0.99     |
|       | rs28365143 | -0.77    | 0.0017* | -1.02     | 0.00016* | -2.51              | 0.000254* | 0.12        | 0.00010* |
| CRHR1 | rs110402   | 0.21     | 0.07    | 0.17      | 0.16     | 0.47               | 0.15      | -0.02       | 0.13     |
|       | rs1876828  | -0.13    | 0.38    | -0.16     | 0.31     | -0.11              | 0.80      | 0.01        | 0.47     |
|       | rs242924   | 0.22     | 0.06    | 0.16      | 0.17     | 0.51               | 0.12      | -0.03       | 0.09     |
|       | rs242939   | 0.34     | 0.13    | 0.38      | 0.08     | 1.17               | 0.06      | -0.05       | 0.06     |
|       | rs4076452  | -0.13    | 0.49    | -0.05     | 0.80     | -0.37              | 0.48      | 0.01        | 0.67     |
| CRHR2 | rs6472257  | -0.10    | 0.62    | -0.26     | 0.21     | -0.63              | 0.27      | 0.03        | 0.30     |
|       | rs2267712  | -0.09    | 0.57    | -0.09     | 0.55     | -0.11              | 0.79      | 0.01        | 0.69     |
|       | rs2270007  | -0.19    | 0.21    | -0.16     | 0.31     | -0.30              | 0.48      | 0.02        | 0.40     |
|       | rs2284216  | -0.25    | 0.24    | -0.02     | 0.94     | -0.77              | 0.20      | 0.02        | 0.37     |
|       | rs4723003  | -0.11    | 0.60    | 0.10      | 0.64     | -0.39              | 0.51      | 0.01        | 0.62     |
| NR3C1 | rs6918     | 0.13     | 0.50    | -0.15     | 0.45     | 0.19               | 0.72      | 0.00        | 0.98     |
|       | rs2963156  | 0.04     | 0.80    | 0.02      | 0.89     | 0.21               | 0.62      | -0.01       | 0.63     |

\*  $p < 0.003938$ , Bonferroni-corrected threshold for 13 hypotheses.

**TABLE S3. Regression coefficients with SNP\*drug class interaction term.** The effect of SNP within each drug class was assessed by re-fitting the regression model with each drug class as the reference category, and assessing the effect of the alternate "A" allele within that drug class. The overall significance of the interaction term is also reported here. The effect of SNP within individual drug arms was assessed by fitting a linear regression model including drug as a categorical predictor and an interaction term between drug and SNP.

|                    |                                | $\beta$ | p                       |
|--------------------|--------------------------------|---------|-------------------------|
| % Reduction        | SSRI: A allele                 | -0.17   | $5.02 \times 10^{-6}$ * |
|                    | <i>Escitalopram</i>            | -0.18   | $5.81 \times 10^{-4}$ * |
|                    | <i>Sertraline</i>              | -0.16   | 0.0020*                 |
|                    | SNRI: A allele                 | -0.01   | 0.89                    |
|                    | <i>Venlafaxine</i>             |         |                         |
|                    | SSRI/SNRI-genotype interaction | 0.16    | 0.019                   |
| Absolute Reduction | SSRI: A allele                 | -3.46   | $1.89 \times 10^{-5}$ * |
|                    | <i>Escitalopram</i>            | -3.49   | 0.0022*                 |
|                    | <i>Sertraline</i>              | -3.46   | 0.0022*                 |
|                    | SNRI: A allele                 | -0.25   | 0.843                   |
|                    | <i>Venlafaxine</i>             |         |                         |
|                    | SSRI/SNRI-genotype interaction | 3.21    | 0.031                   |
| Response           | SSRI: A allele                 | -1.21   | $4.32 \times 10^{-5}$ * |
|                    | <i>Escitalopram</i>            | -0.37   | $4.97 \times 10^{-5}$ * |
|                    | <i>Sertraline</i>              | -0.16   | 0.066                   |
|                    | SNRI: A allele                 | 0.27    | 0.55                    |
|                    | <i>Venlafaxine</i>             |         |                         |
|                    | SSRI/SNRI-genotype interaction | -1.48   | 0.0066                  |
| Remission          | SSRI: A allele                 | -1.33   | $4.47 \times 10^{-5}$ * |
|                    | <i>Escitalopram</i>            | -1.30   | 0.0032*                 |
|                    | <i>Sertraline</i>              | -1.38   | 0.0036*                 |
|                    | SNRI: A allele                 | -0.29   | 0.54                    |
|                    | <i>Venlafaxine</i>             |         |                         |
|                    | SSRI/SNRI-genotype interaction | -1.03   | 0.071                   |

\*  $p < 0.003938$ , Bonferroni-corrected threshold for 13 hypotheses.

**TABLE S4. Association of genotype with treatment response after stratification by Caucasian vs. non-Caucasian participants in the iSPOT-D cohort**

|                  |                     | Caucasian |        | Non-Caucasian |       |
|------------------|---------------------|-----------|--------|---------------|-------|
|                  |                     | $\beta$   | p      | $\beta$       | p     |
| % Reduction      | Genotype (A allele) | -0.11     | 0.009  | -0.12         | 0.011 |
| Linear Reduction | Genotype (A allele) | -2.15     | 0.018  | -2.58         | 0.018 |
| Response         | Genotype (A allele) | -0.63     | 0.061  | -0.85         | 0.021 |
| Remission        | Genotype (A allele) | -1.12     | 0.0033 | -0.88         | 0.024 |
